# Supplementary material
Source: PubMed Central journal article supplement (PMC5100794)
Supplement: supp_pp.16.00923_PP2016-00923R2_Supplemental_Material.pdf [file supp_pp.16.00923_PP2016-00923R2_Supplemental_Material.pdf]

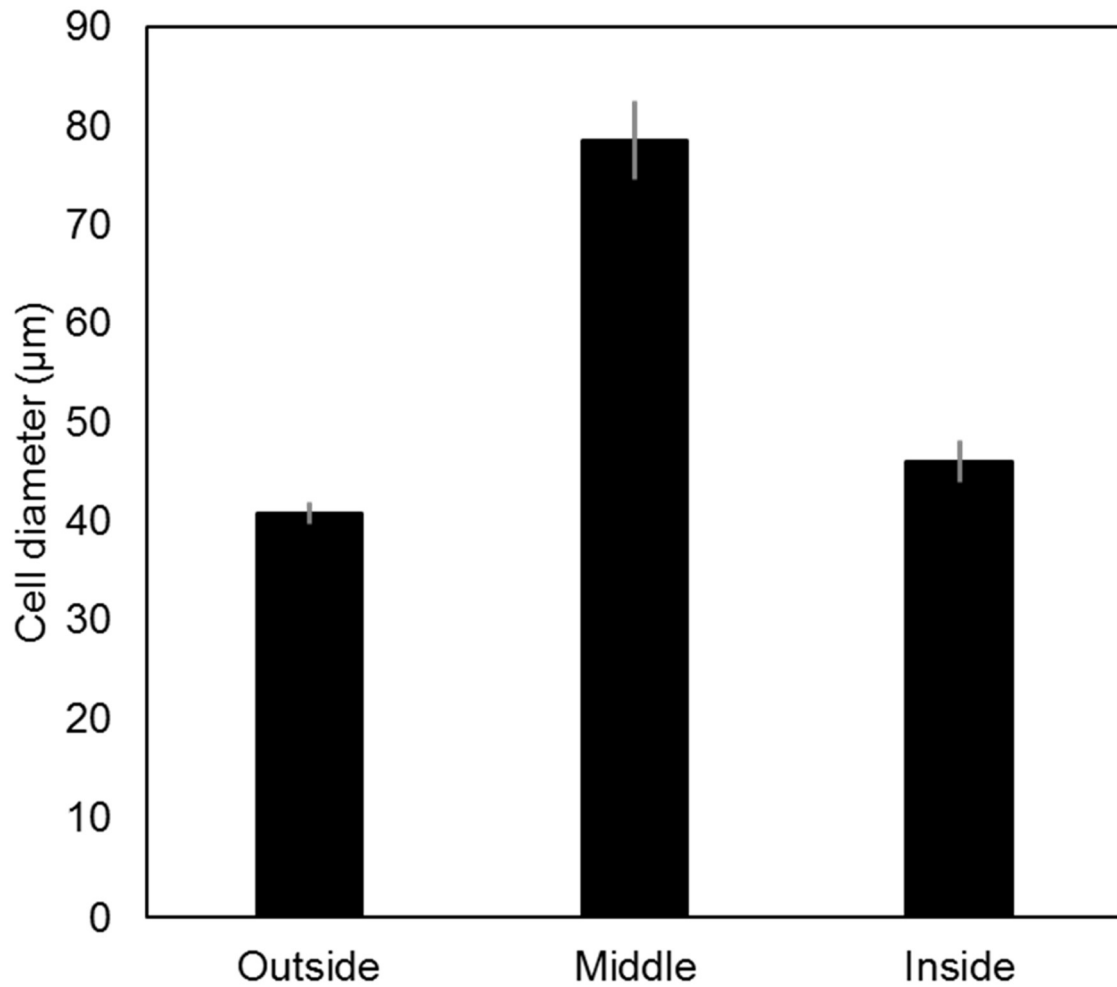

**FIGURE S1.** Mean diameter of cells located in the outer, middle and inner layers of the cortex. Cell in the middle of the cortex show a mean diameter of  $78.6 \mu\text{m} \pm 3.95 \mu\text{m SE}$  ( $n = 89$ ), while the outer and inner layers of cells have a mean diameter of  $40.8 \mu\text{m} \pm 1.06 \mu\text{m SE}$  ( $n = 89$ ) and  $46 \mu\text{m} \pm 2.09 \mu\text{m SE}$  ( $n = 89$ ), respectively.

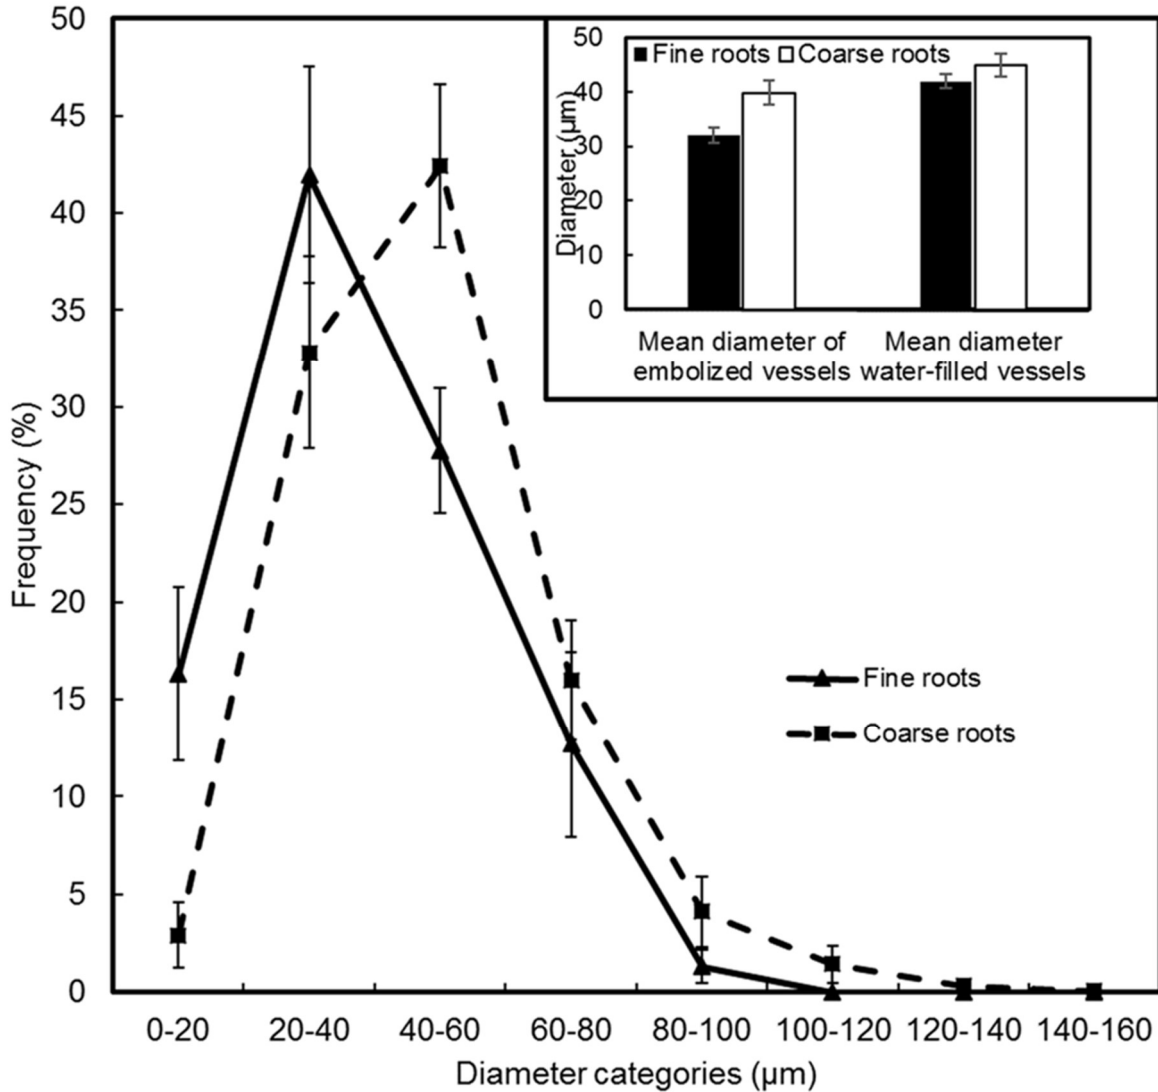

**FIGURE S2.** Frequency distribution of all vessel diameters in fine and coarse roots. Each data point is the vessel frequency mean  $\pm$  SE ( $n= 13$ ) for a specific diameter size class. Inset show the mean diameter of embolized vessels and water filled vessels for fine and woody roots.

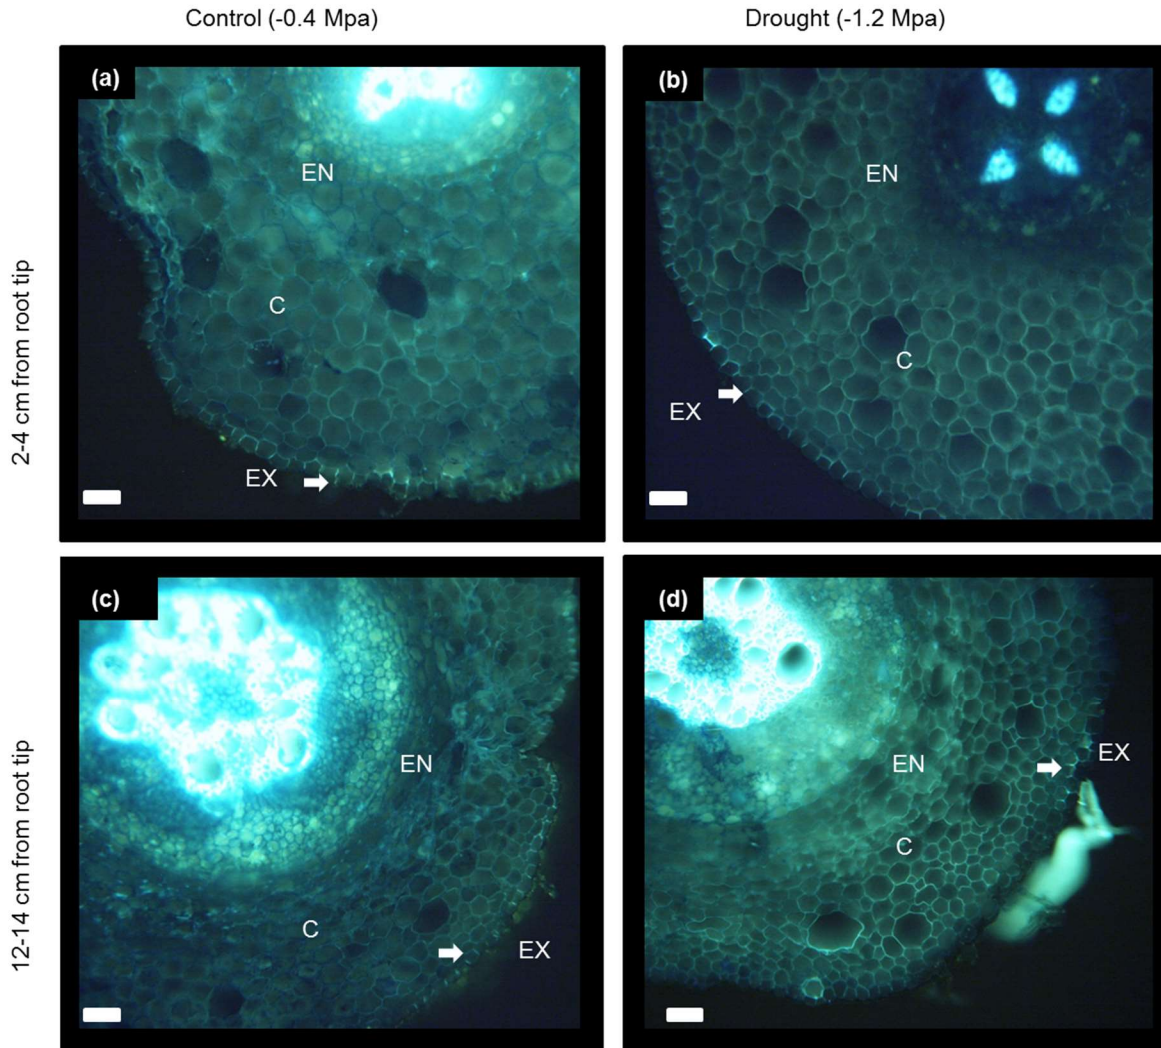

**FIGURE S3.** Free-hand cross sections of fine roots obtained from grapevine plants subjected to well-watered (Control,  $-0.4 \text{ MPa } \Psi_{\text{stem}}$ ) and drought-stress (3 days of water deprivation  $-1.2 \text{ MPa } \Psi_{\text{stem}}$ ) conditions. Images were stained with berberine-aniline blue and imaged under fluorescence light (excitation filter, 400- to 410-nm peak emission; dichromatic mirror, 455 nm; and barrier filter, 455 nm). Depositions of suberin and lignin appear bright green (white arrows). (a) (c), The exodermis show deposition of suberin-lignin material on the anticlinal and interior periclinal walls. The endodermis shows negligible deposition of suberin-lignin and only an early development of the casparian strip is present in some cells. (b) (d), Deposition of suberin-lignin is shown mostly in the anticlinal walls of cells. No sign of suberin-lignin deposition is present in the endodermis. No clear differences in suberin-lignin deposition can be account when control and drought treatments are compared. EX, exodermis; EN, endodermis; C, cortex. Bars =  $200 \mu\text{m}$ .

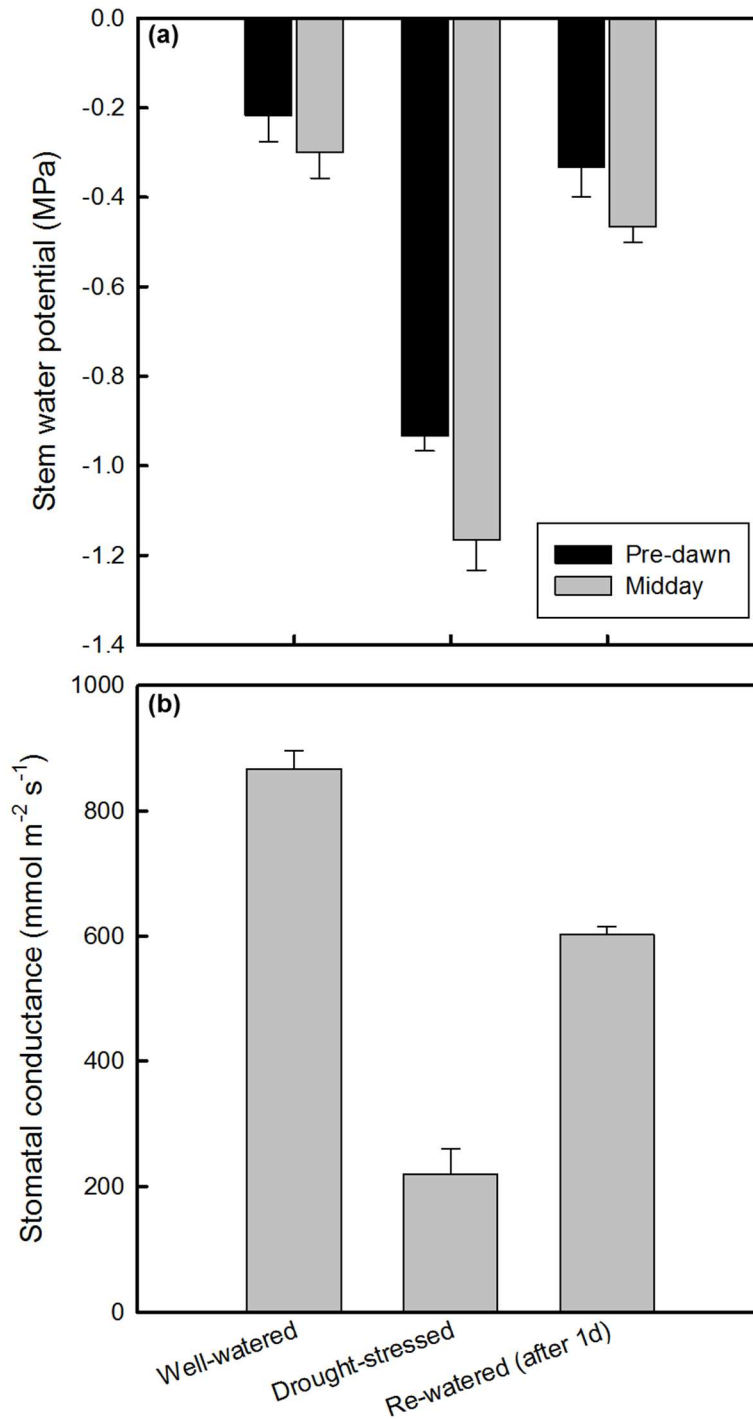

**FIGURE S4.** Pre-dawn and Midday stem water potentials (a) and stomatal conductance (b) measurements of well-watered, drought-stressed and re-watered (after 1d) plants. Stomata conductance was measured midday between 1100 and 1300 h in the greenhouse using a SC-1 leaf porometer (Decagon Devices Inc., Pullman, Washington, USA) and measuring 3 leaves per plant. Bars are means  $\pm$  SE (n=3).

(a) Coarse Roots

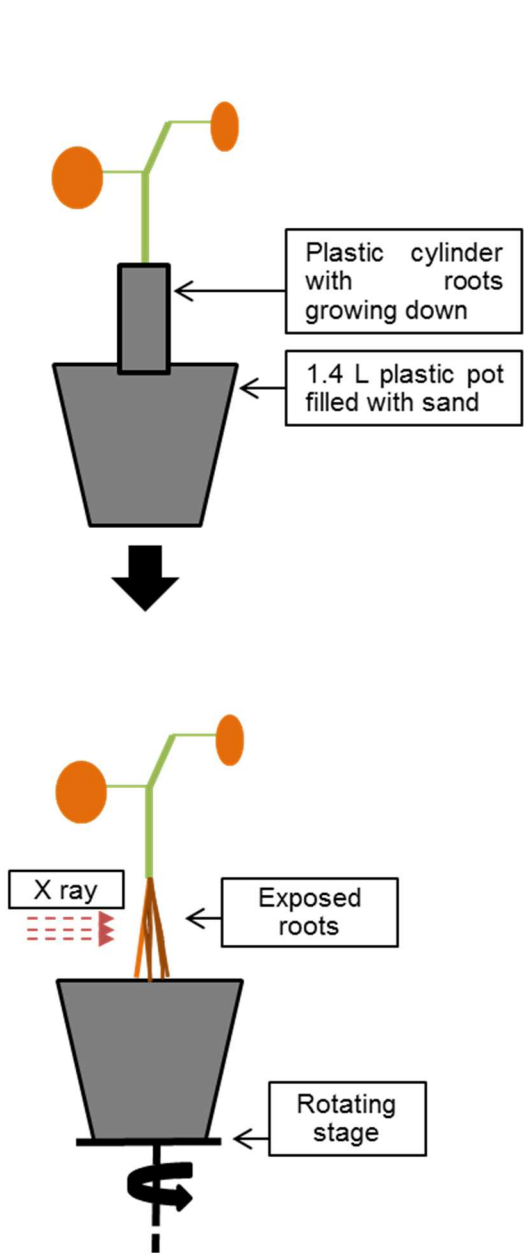

(b) Fine Roots

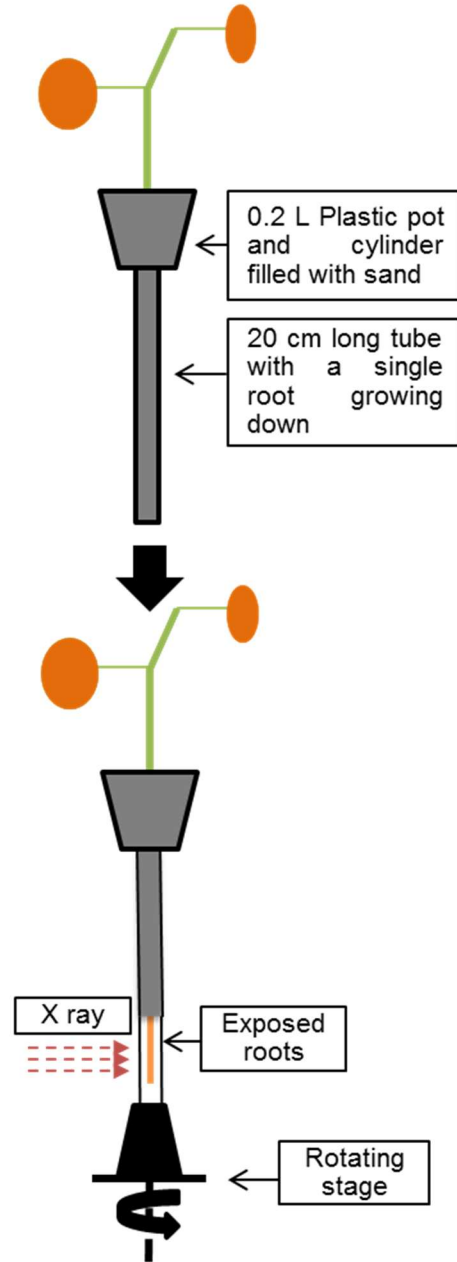

**FIGURE S5.** Cartoon illustrating how plants were grown in order to get access to coarse and fine roots. (a), Coarse roots were grown surrounded by a plastic cylinder filled with sand such that the cylinder and the sand was easily removed prior scanning. (b), Fine roots were grown inside a 20 cm long plastic tube. At the moment of the scanning, the sand surrounding the target zone was removed.

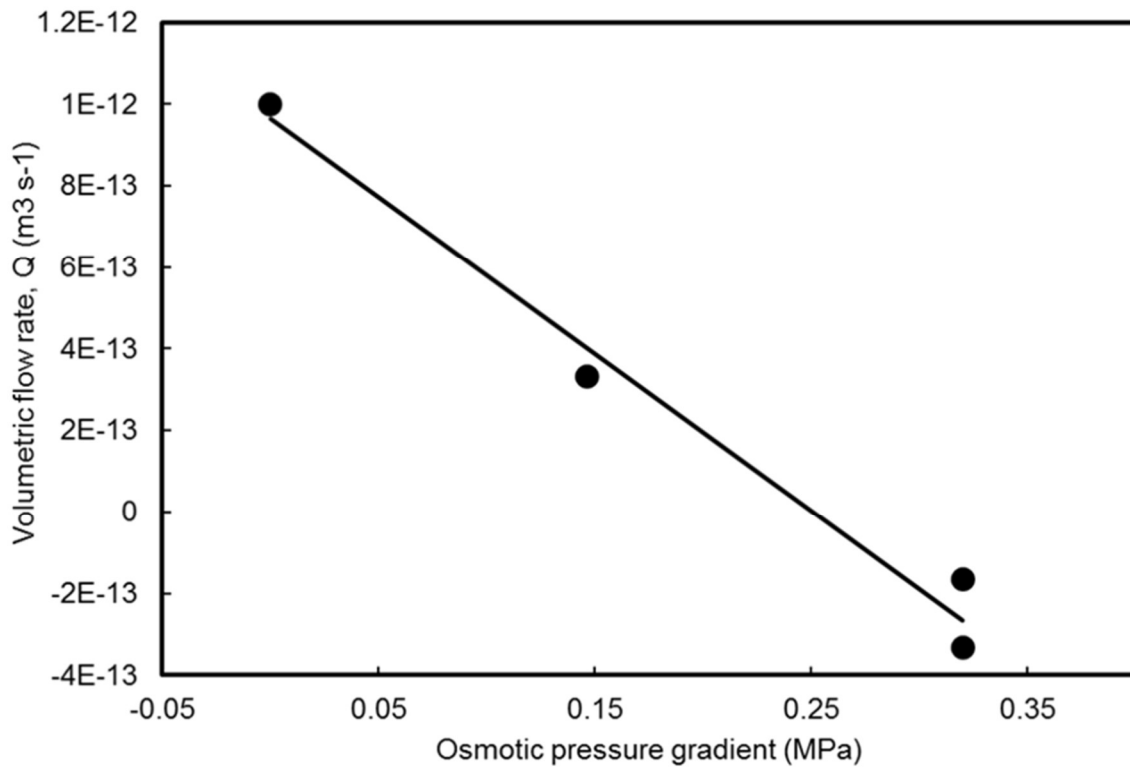

**FIGURE S6.** Representative relationship between osmotic pressure and volumetric flow rate. Inflow occurred at 0 and -0.15 MPa  $\Psi_{\pi}$  of the solution. Outflow occurred when the  $\Psi_{\pi}$  of the solution was -0.3 MPa. Solid line is a linear regression of the form  $Y = -4e^{-12} X + 1e^{-12}$  ( $R^2 = 0.98$ ).
